# Supplementary material
Source: publisher site journal article supplement (https://www.dovepress.com/article/498208)
Supplement: Supplementary file 1 [file get_supplementary_file.php]

**Highly stable antitumor silver-lipid nanoparticles optimized for targeted therapy**

Ammar Darwish1, Nikolett Sándor1, Imre Szenti2, Tamás Marosvölgyi3, Kata Juhász1, Andrea Rónavári2, Edi Kachal2, Bence Kutus4, Zoltán Kónya2, Zsolt Balogi1

1Institute of Biochemistry and Medical Chemistry, Medical School, University of Pécs, Hungary

2Department of Applied and Environmental Chemistry, University of Szeged, Hungary

3Institute of Bioanalysis, Medical School, University of Pécs, Hungary

4Department of Molecular and Analytical Chemistry, University of Szeged, Hungary

correspondence to Dr. Zsolt Balogi, email: zsolt.balogi@aok.pte.hu

**Supplementary data**

**
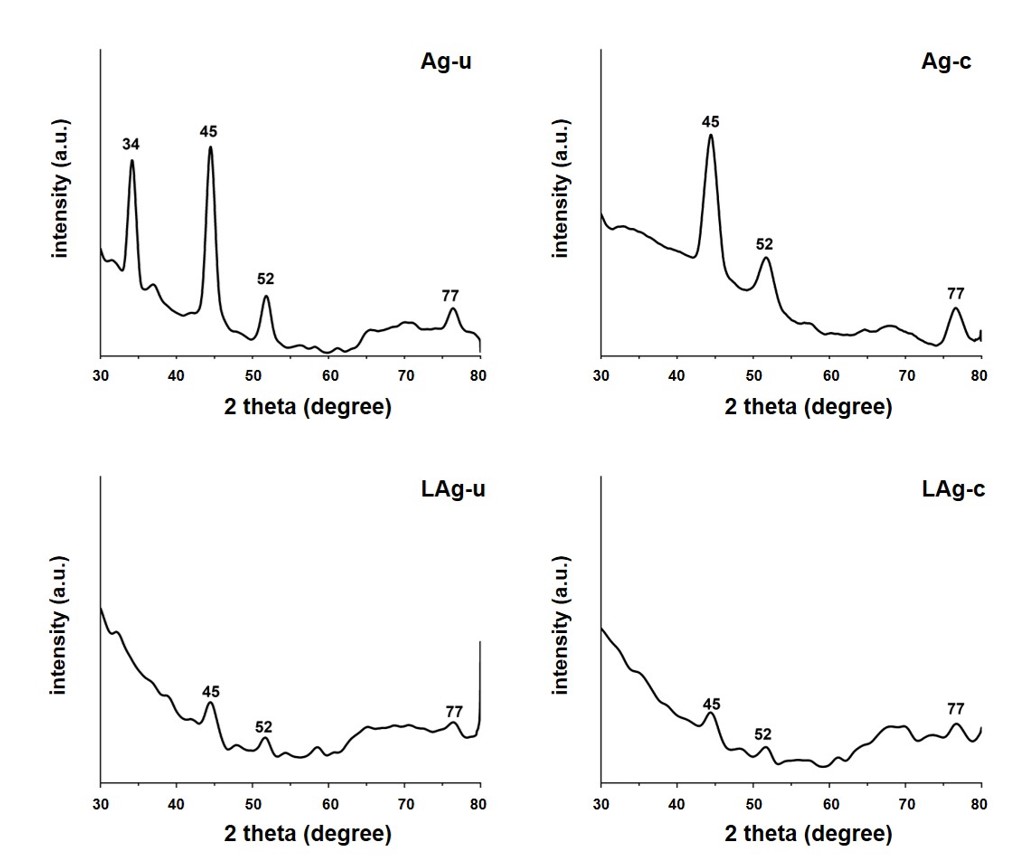
**

**Supplementary Figure 1** X-ray diffraction patterns of free AgNPs and PC/PG/SM-LAgs of different types.

**
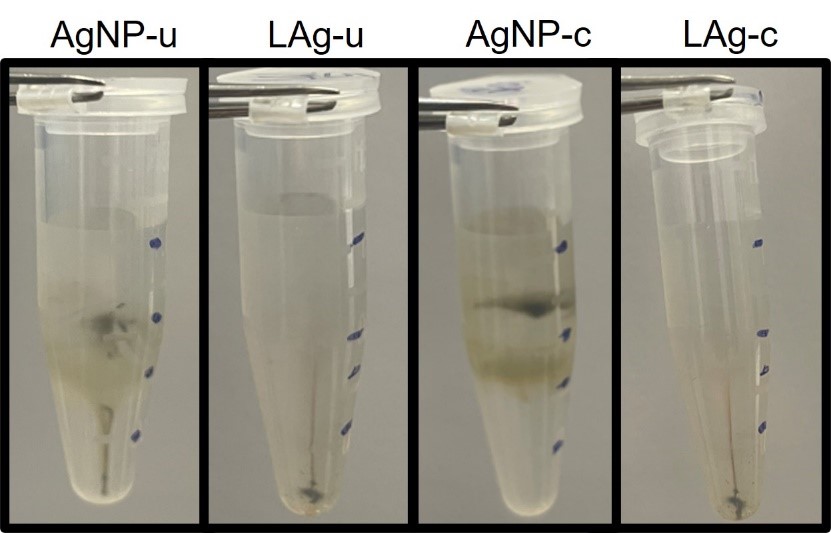
**

**Supplementary Figure 2** Differential DGC profiles of free AgNPs and PC-LAgs of different types.


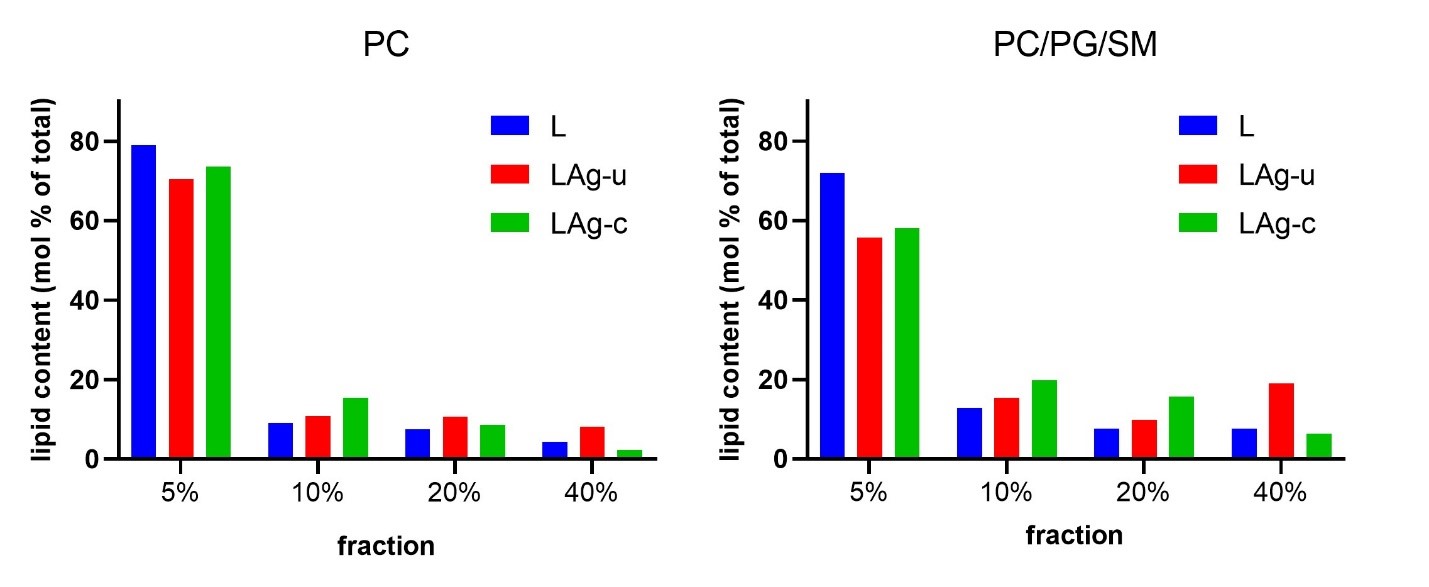


**Supplementary Figure 3** Lipid content shift in the DGC fractions of LAgs. Purified empty liposomes (L) (PC and PC/PG/SM) and corresponding LAgs were fractionated by DGC, followed by collection and lipid content analysis of each fraction. Lipid content of fractions is displayed as mol % of the total lipid amount based on fatty acid determination.


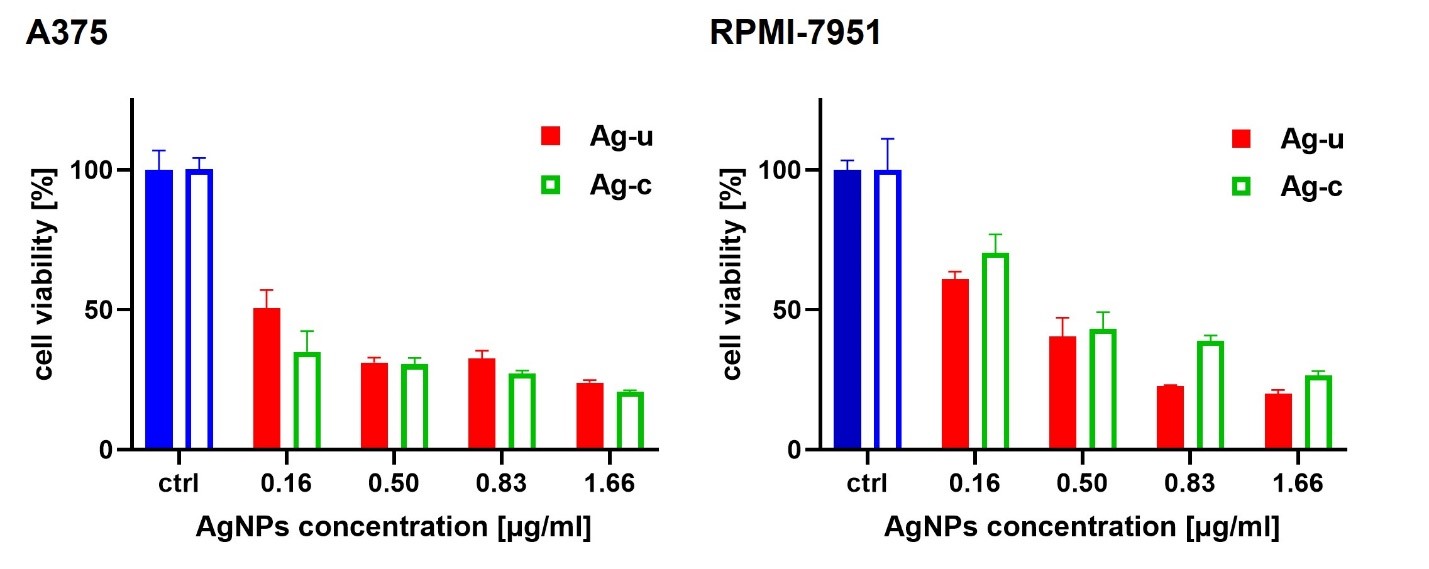


**Supplementary Figure 4** Concentration-dependent effect of free AgNPs on the viability of melanoma cells. Viability of A375 and RPMI-7951 cells was measured by MTT assay upon exposure to free AgNPs for 48 h. Based on ICP-MS measurements of purified vs. unpurified samples, 0.5 g/ml AgNP levels are considered equivalent to the AgNP levels in LAgs (30 % EE). **Note**: n = 6.


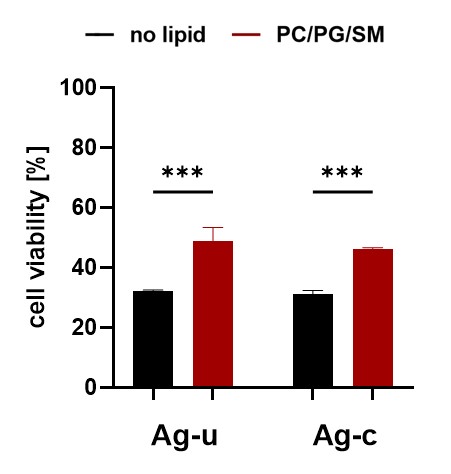


**Supplementary Figure 5** Cell viability of HEK-293 cells measured by MTT assay upon 48 h exposure to LAgs, data are expressed as relative to those of untreated control (AgNPs) or empty liposomes (LAgs). **Note**: n = 6, and ***p < 0.001.
